# Supplementary material for: Comparative Study of Chemical Composition and Antioxidant Activity of Essential Oils and Crude Extracts of Four Characteristic Zingiberaceae Herbs
Source: MDPI journal article supplement (doi:10.3390/plants10030501), 2021-03-08
Supplement: s1 [file s1]

---

*Supplementary Material*

## **Comparative Study of Chemical Composition and Antioxidant Activity of Essential Oils and Crude Extracts of Four Characteristic *Zingiberaceae* Herbs**

**Milena** Ivanović, Kaja Makoter and Maša Islamčević Razboršek \*

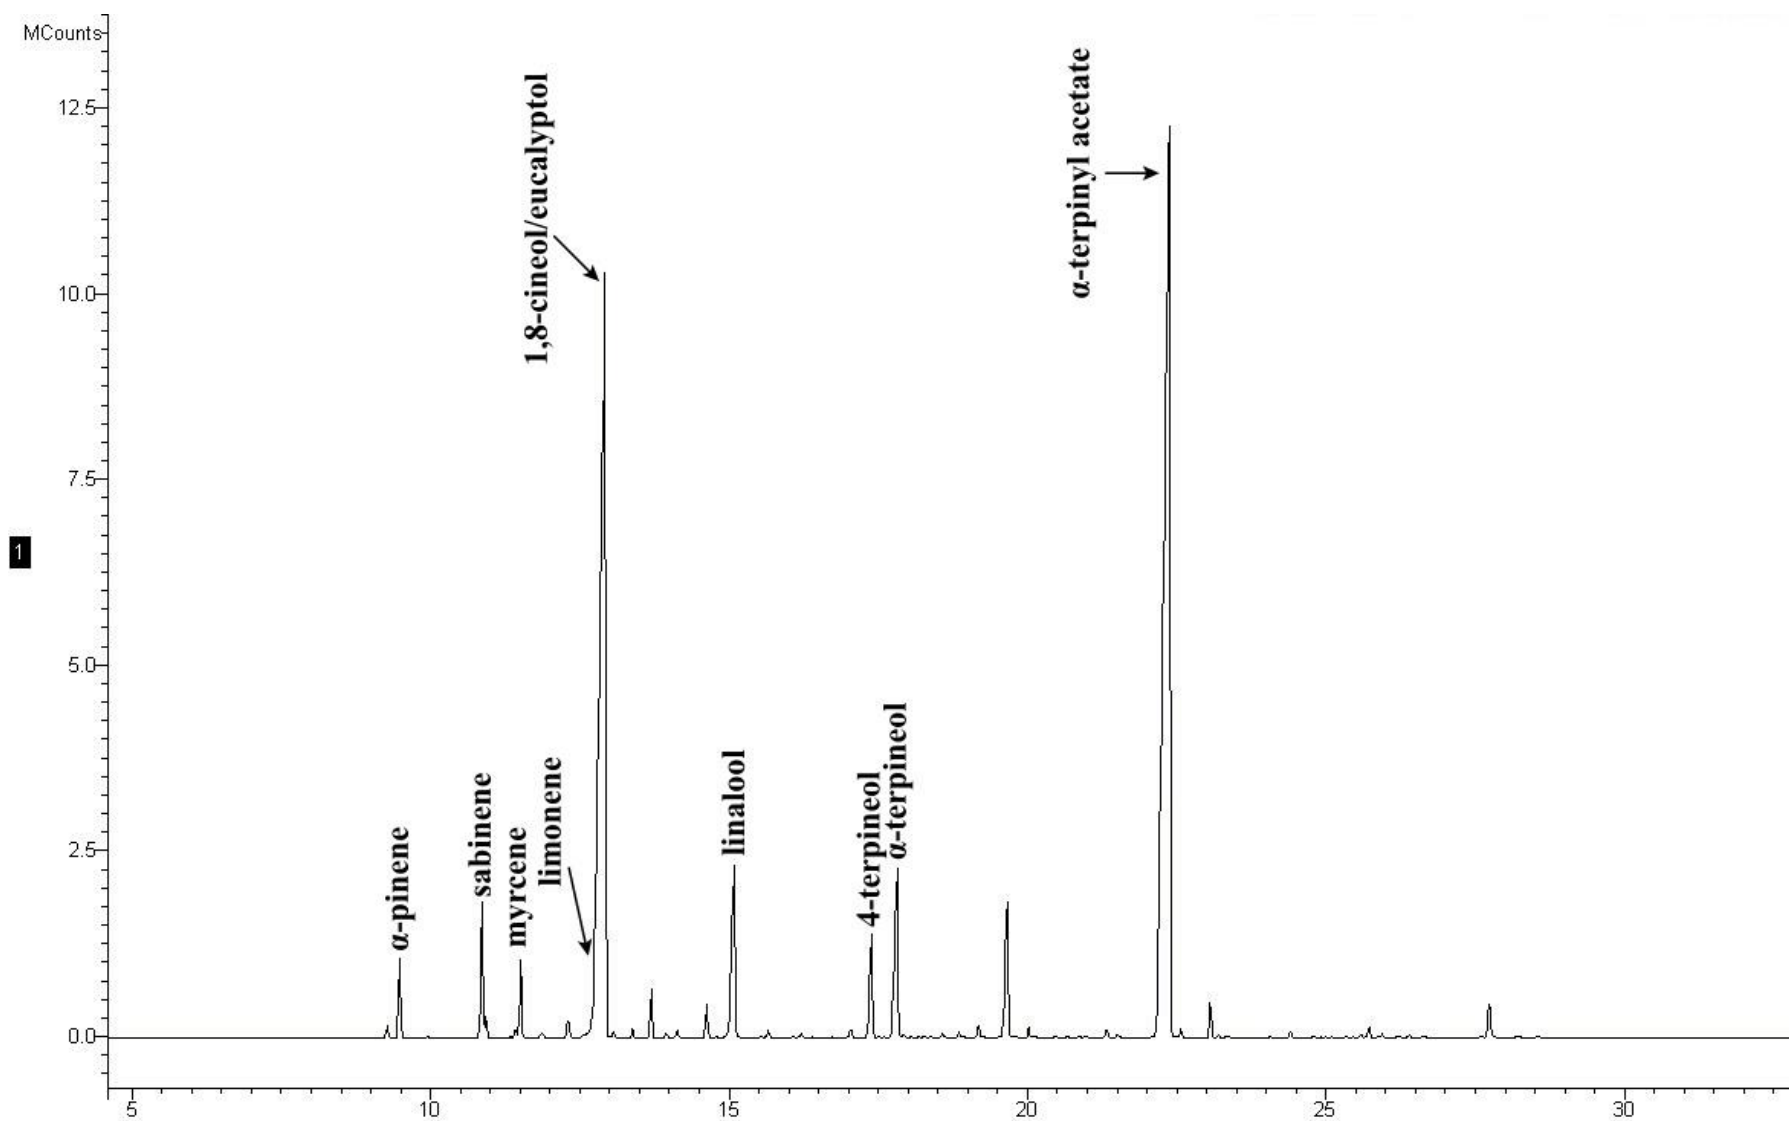

Figure S1. Typical GC-MS/MS chromatogram of cardamom (*Elettaria cardamomum* L. Maton) essential oil.

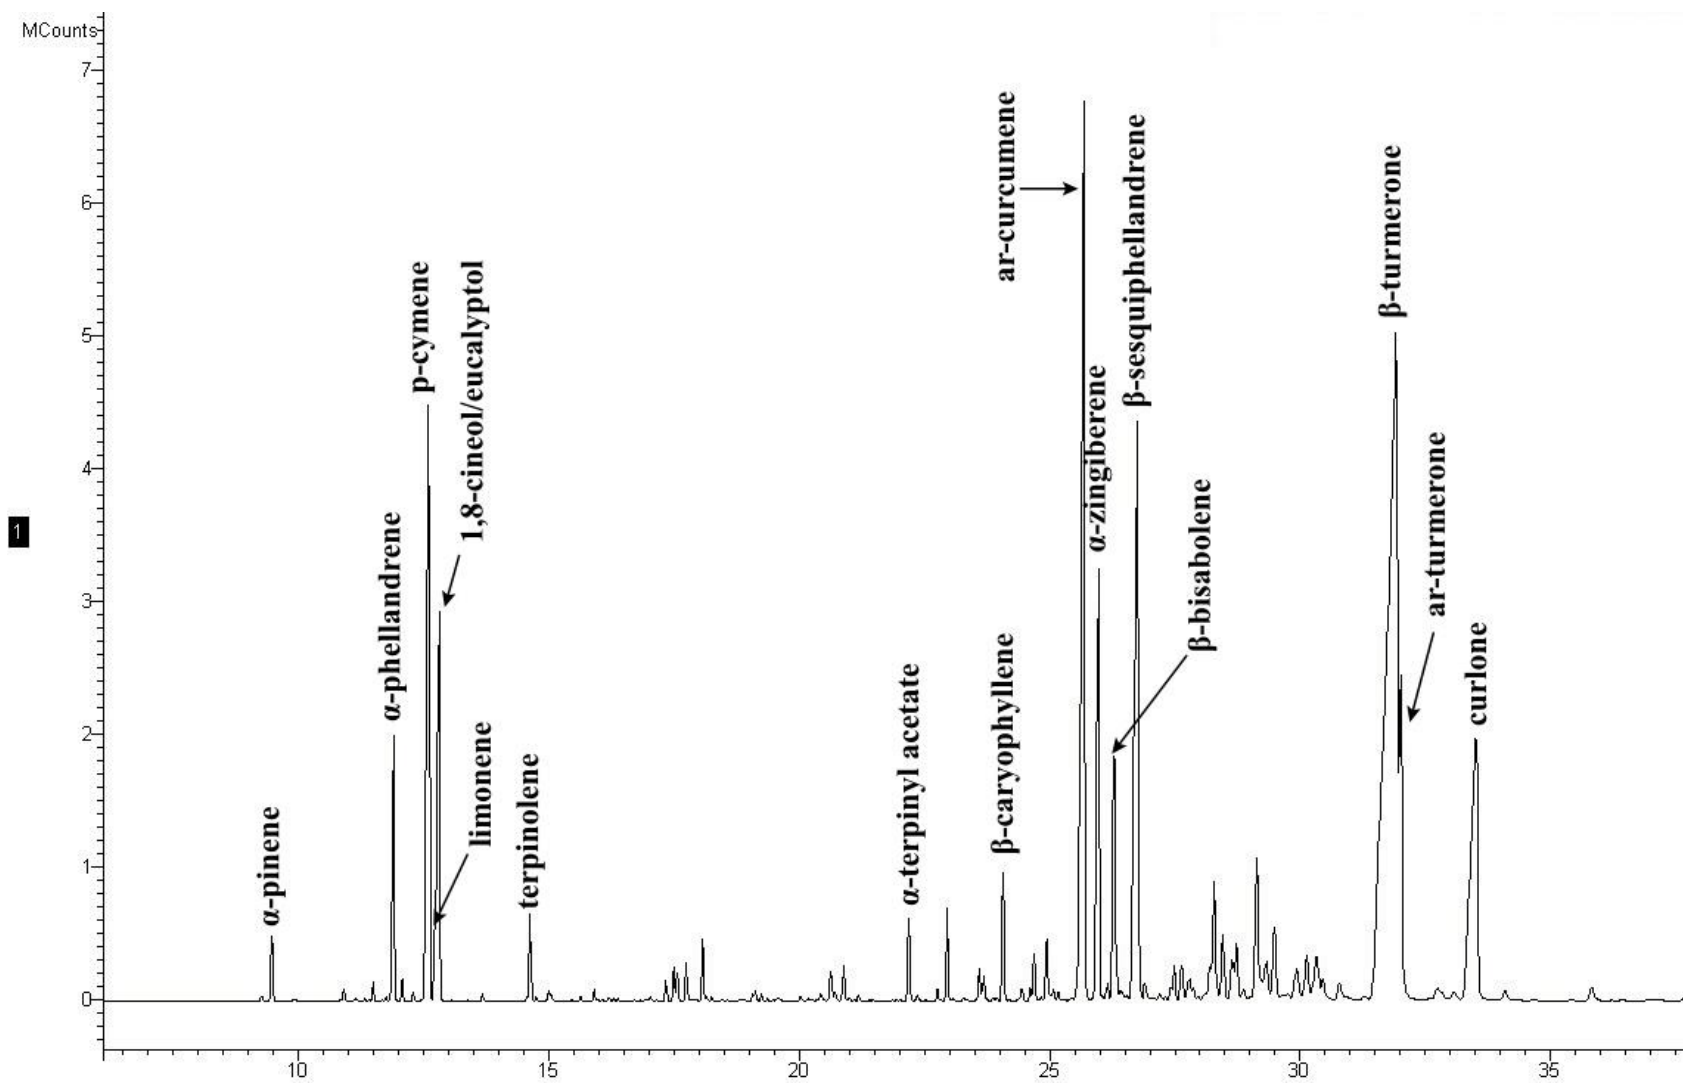

Figure S2. Typical GC-MS/MS chromatogram of turmeric (*Curcuma longa* L.) essential oil.

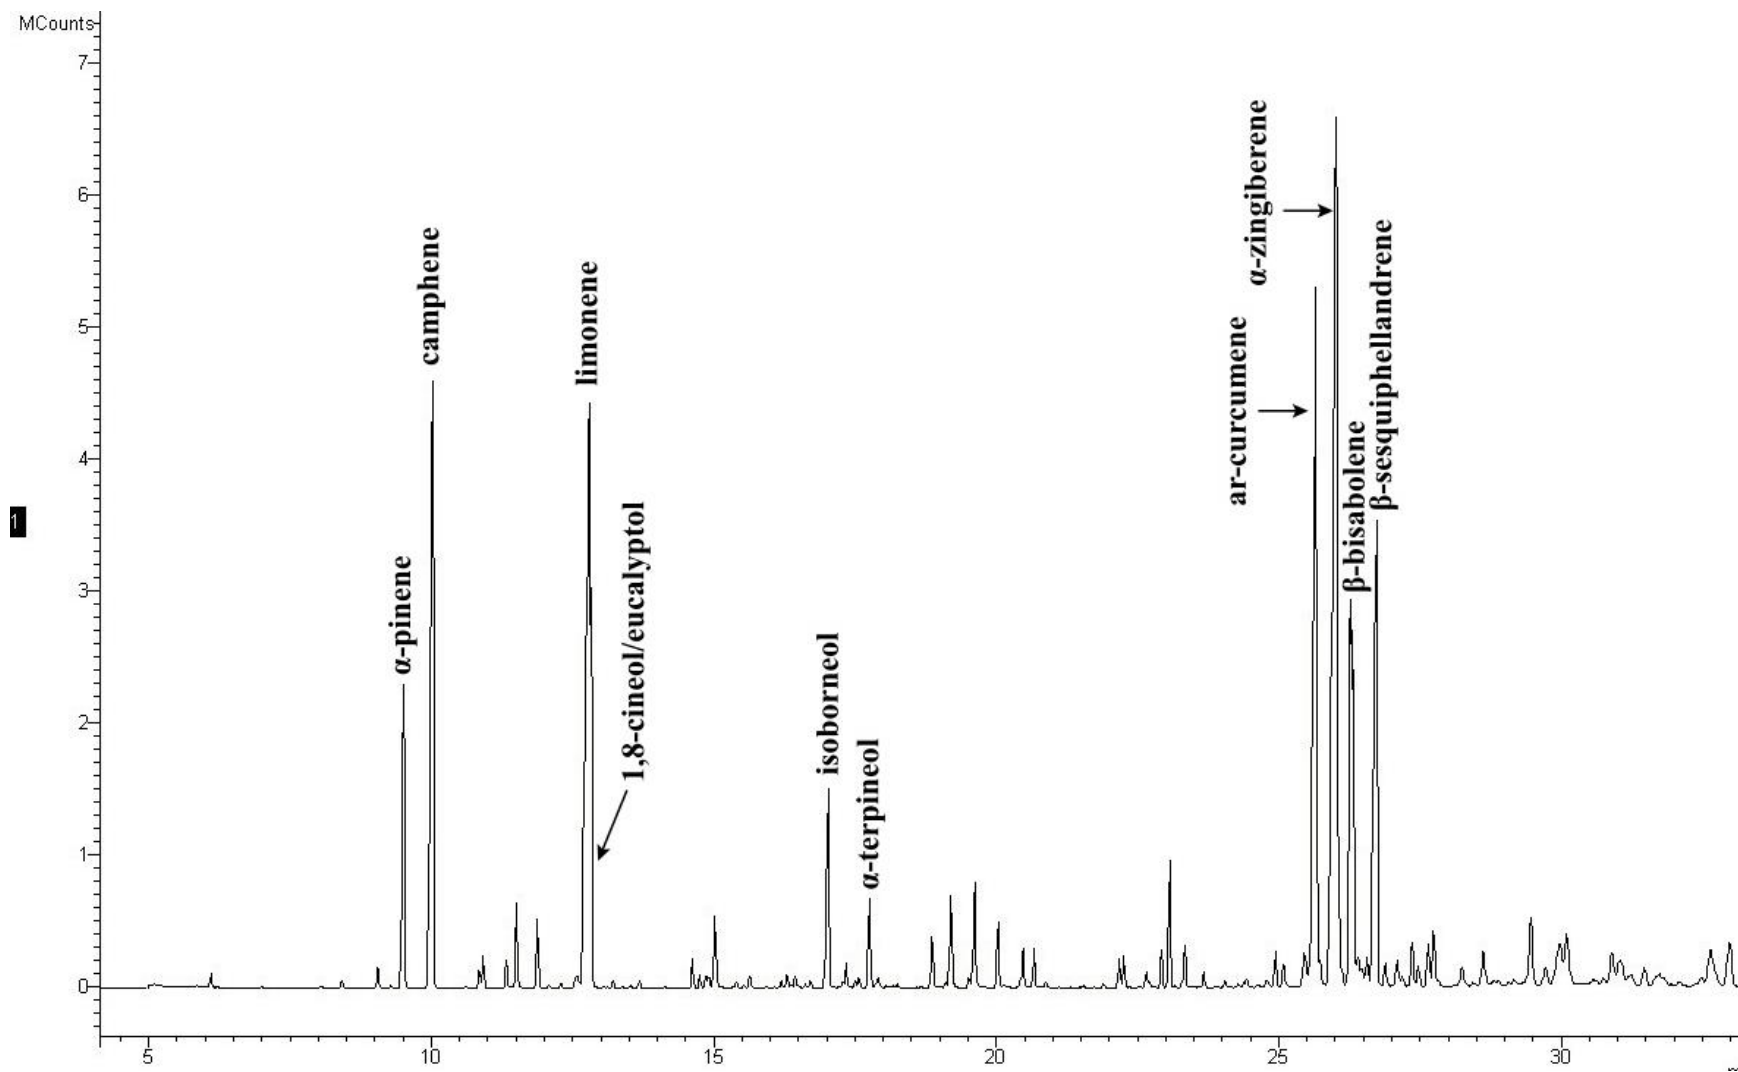

**Figure S3.** Typical GC-MS/MS chromatogram of ginger (*Zingiber officinale* Roscoe) essential oil.

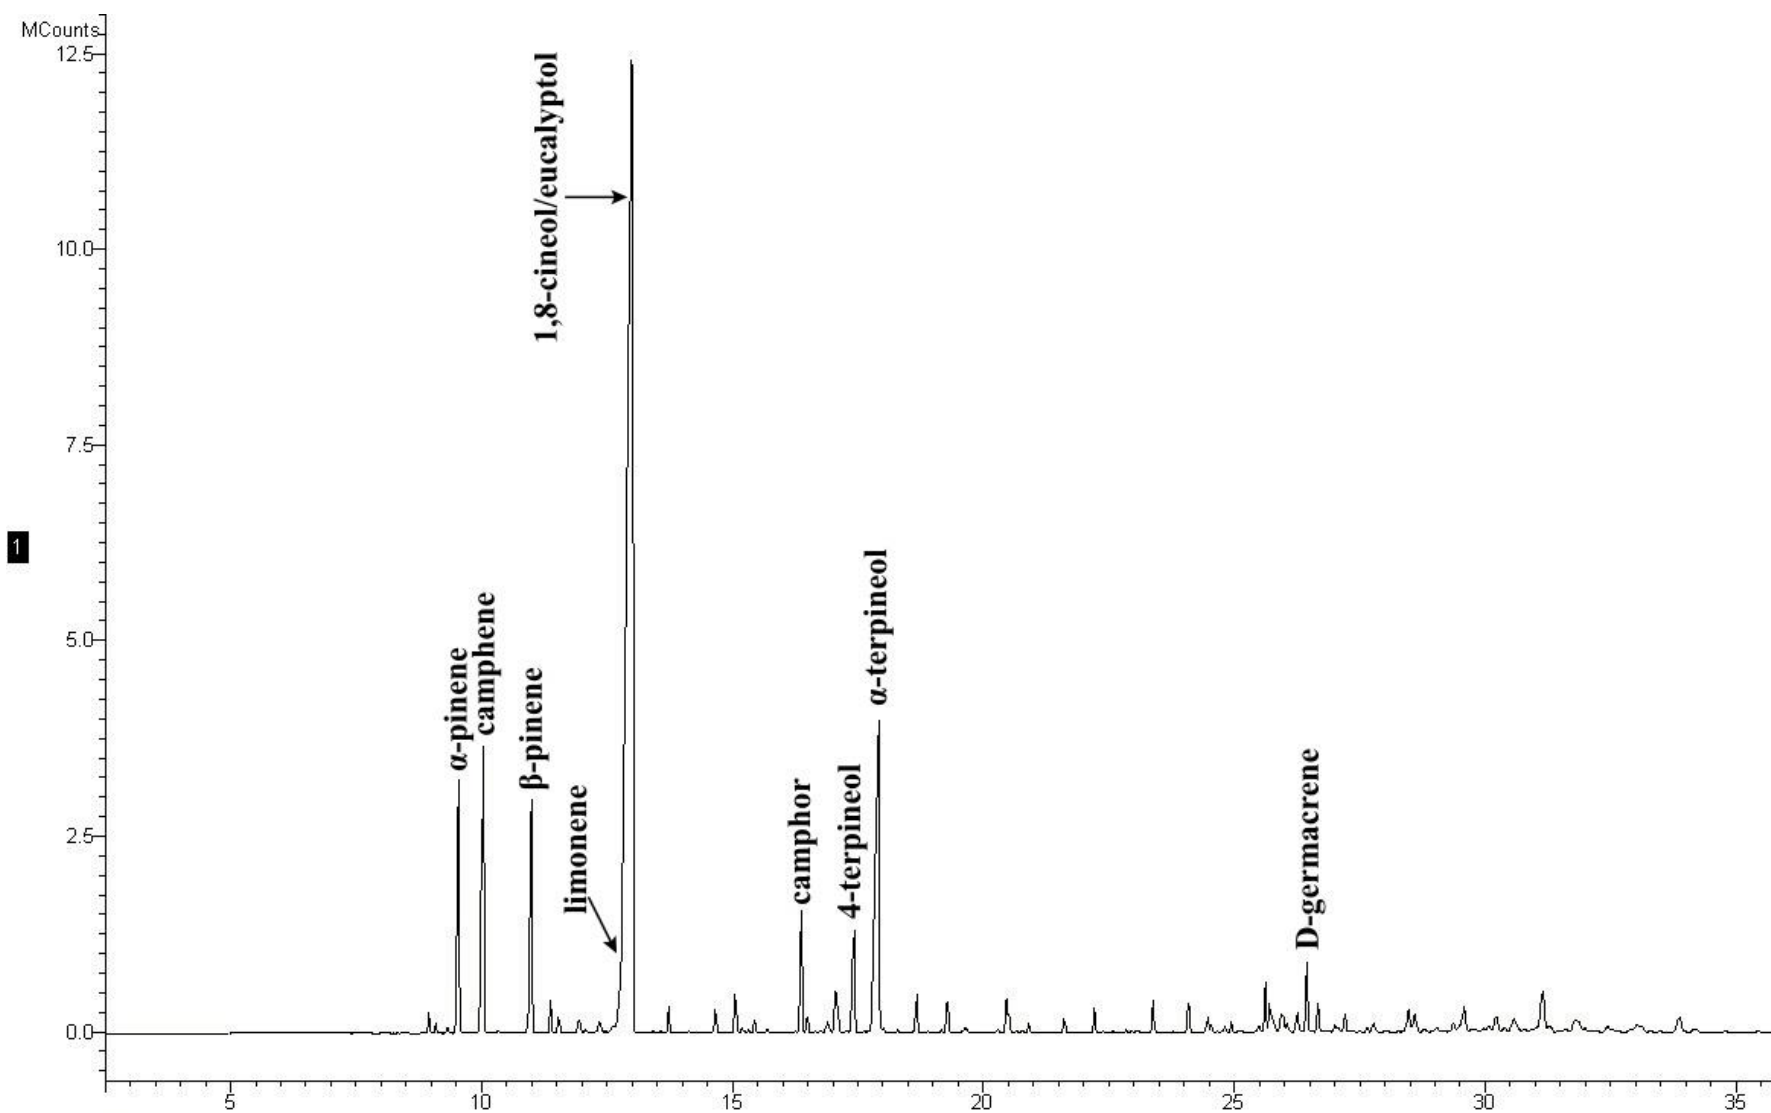

**Figure S4.** Typical GC-MS/MS chromatogram of galangal (*Alpinia officinarum* Hance) essential oil.
